# Supplementary material for: An adhesion-switchable hydrogel dressing for painless dressing removal without secondary damage
Source: Royal Society of Chemistry journal article supplement (doi:10.1039/d4tb00621f), 2024-01-01
Supplement: d4tb00621f1.pdf [file d4tb00621f1.pdf]

## Electronic Supplementary Information

### An Adhesion-Switchable Hydrogel Dressing for Painless Dressing Removal without Secondary Damage

Zhiling Yu,<sup>a,b</sup> Weiqiang Huang,<sup>b</sup> Fei Wang,<sup>c</sup> Xuan Nie,<sup>b</sup> Guang Chen,<sup>b</sup> Lei Zhang,<sup>a</sup> Ai-Zong Shen,<sup>a,\*</sup> Ze Zhang,<sup>b,\*</sup> Chang-Hui Wang,<sup>d,\*</sup> Ye-Zi You<sup>a,b,\*</sup>

<sup>a</sup> Department of Pharmacy, The First Affiliated Hospital of USTC, Division of Life Sciences and Medicine, University of Science and Technology of China, Hefei, Anhui, 230026, China

<sup>b</sup> Department of Polymer Science and Engineering, University of Science and Technology of China, Hefei, Anhui, 230026, China

<sup>c</sup> Department of Neurosurgical, The First Affiliated Hospital of USTC, Division of Life Sciences and Medicine, University of Science and Technology of China, Hefei, Anhui, 230026, P. R. China

<sup>d</sup> Department of Cardiology, The First Affiliated Hospital of Anhui Medical University, Hefei, Anhui 230022, P. R. China.

| Sample                                | QCS<br>(wt%) | NIPAm<br>(wt%) | AAm<br>(wt%) | TA<br>(wt%) | PEGDA<br>(wt%) | 2959<br>(wt%) |
|---------------------------------------|--------------|----------------|--------------|-------------|----------------|---------------|
| P(AAm-co-NIPAm)                       | 0            | 18             | 3            | 0           | 0.4            | 0.2           |
| P(AAm-co-NIPAm)/QCS/TA <sub>0</sub>   | 3            | 18             | 3            | 0           | 0.4            | 0.2           |
| P(AAm-Co-NIPAm)/QCS/TA <sub>0.1</sub> | 3            | 18             | 3            | 0.1         | 0.4            | 0.2           |
| P(AAm-Co-NIPAm)/QCS/TA <sub>0.2</sub> | 3            | 18             | 3            | 0.2         | 0.4            | 0.2           |
| P(AAm-Co-NIPAm)/QCS/TA <sub>0.4</sub> | 3            | 18             | 3            | 0.4         | 0.4            | 0.2           |
| P(AAm-Co-NIPAm)/QCS/TA <sub>0.5</sub> | 3            | 18             | 3            | 0.5         | 0.4            | 0.2           |

Fig. S1 The weight fraction of each component in the hydrogel.

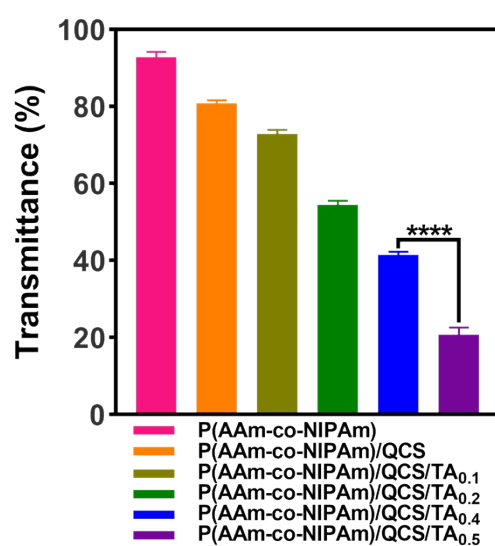

Fig. S2 The transmittance of the hydrogels. Transmittance captured at 400 nm wavelength by UV-Vis spectrometer.

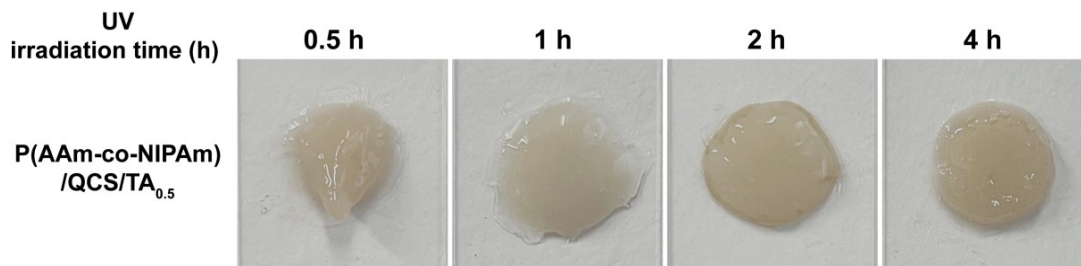

Fig. S3 The UV light irradiation time of the P(AAm-co-NIPAm)/QCS/TA<sub>0.5</sub> hydrogel.

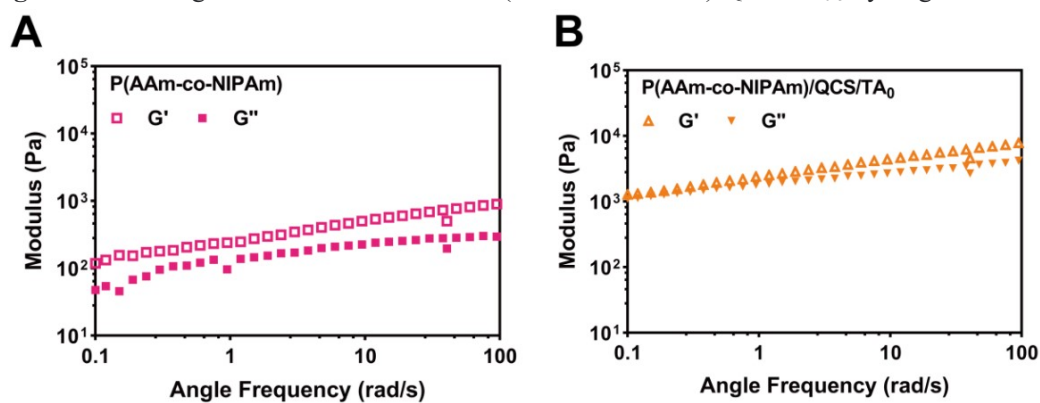

Fig. S4 (A) Frequency dependency of the storage ( $G'$ ) and loss ( $G''$ ) moduli of the P(AAm-co-NIPAm) hydrogel. (B) Frequency dependency of the storage ( $G'$ ) and loss ( $G''$ ) moduli of the P(AAm-co-NIPAm)/QCS/TA<sub>0</sub> hydrogel.

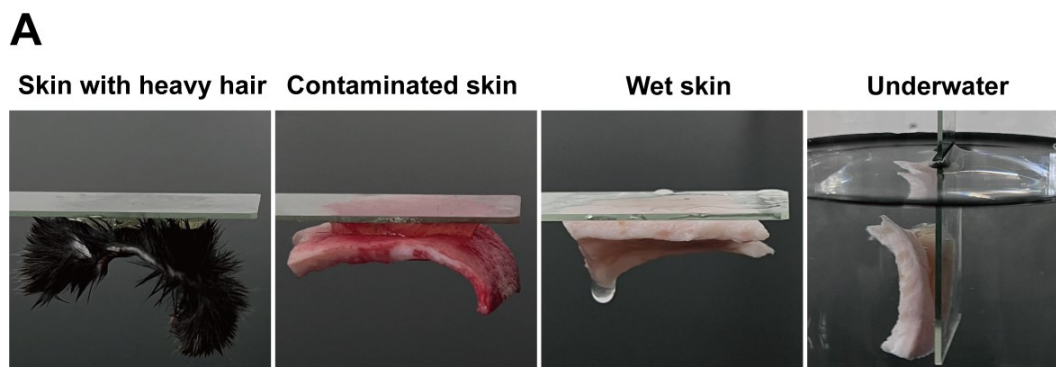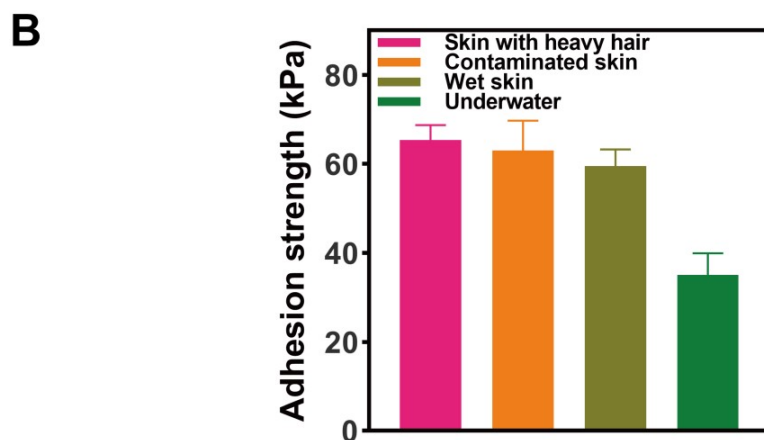

**Fig. S5** (A) Photographs of the P(AAm-co-NIPAm)/QCS/TA<sub>0.4</sub> hydrogel adhered to different complex biological substrates (B) Adhesion strength of the P(AAm-co-NIPAm)/QCS/TA<sub>0.4</sub> hydrogel on different substrates.

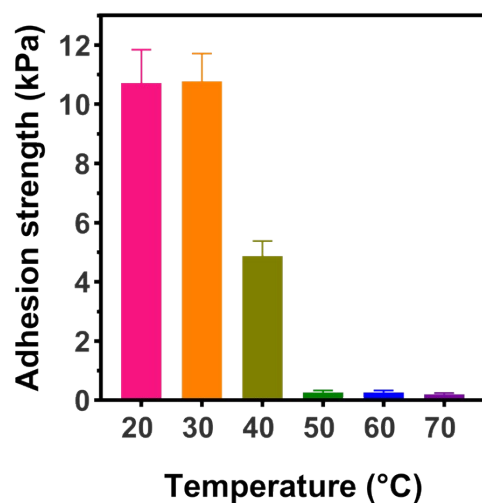

**Fig. S6** The relationship between the temperature and adhesion strength of the P(AAm-co-NIPAm)/QCS/TA<sub>0.4</sub> hydrogel.

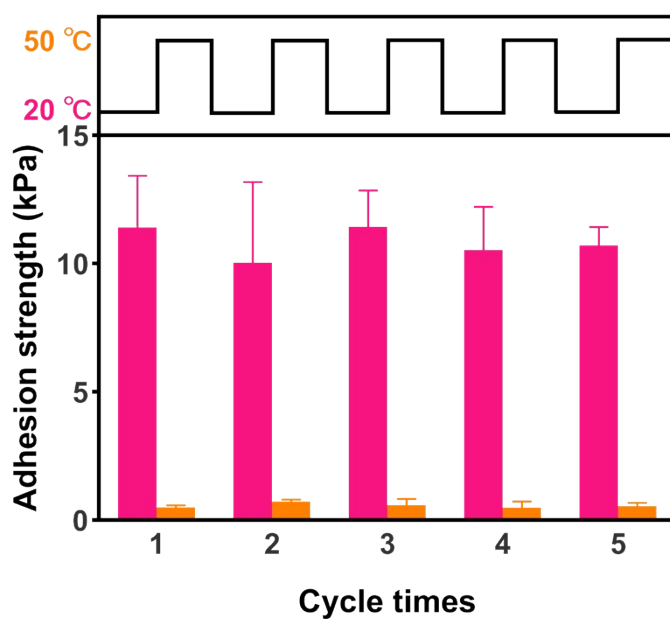

**Fig. S7** Thermo-responsive switchable adhesion cycles of the P(AAm-co-NIPAm)/QCS/TA<sub>0.4</sub> hydrogel at low and high temperature.

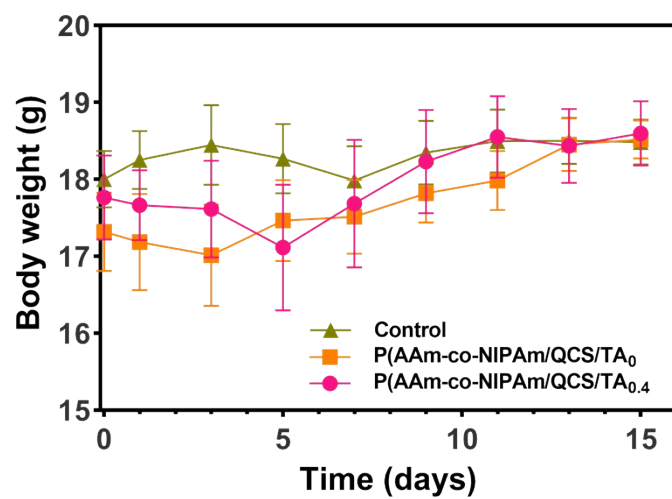

Fig. S8 Body weight tracking of mice from different treatment groups.
